# Supplementary material
Source: HighWire-hosted journal article supplement (https://care.diabetesjournals.org/content/suppl/2007/08/13/dc07-0066)

# Supplemental Figure 1

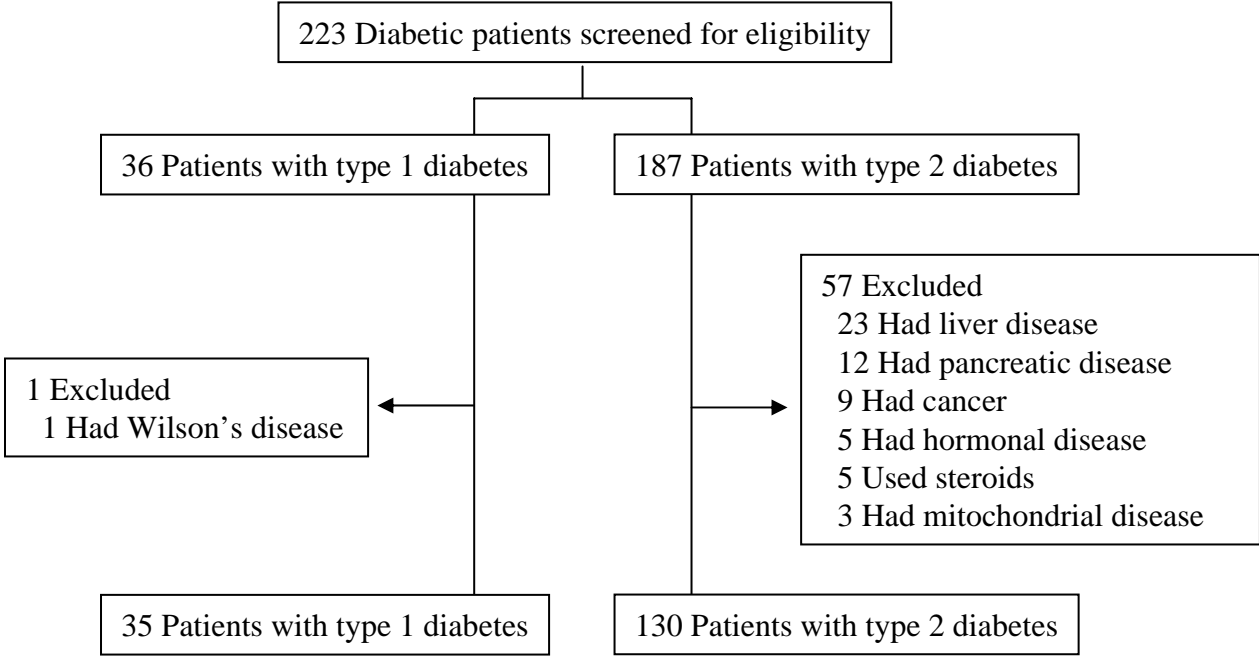

# Supplemental Figure 2

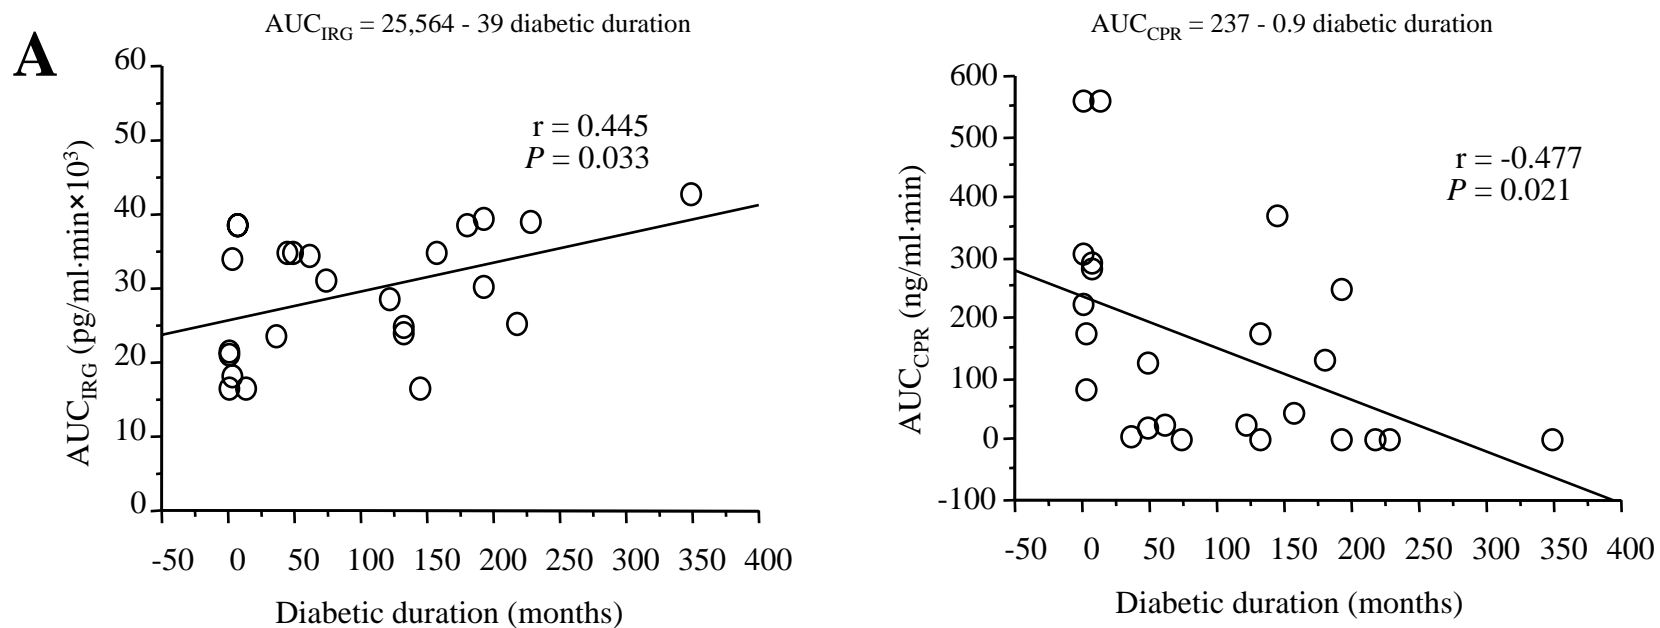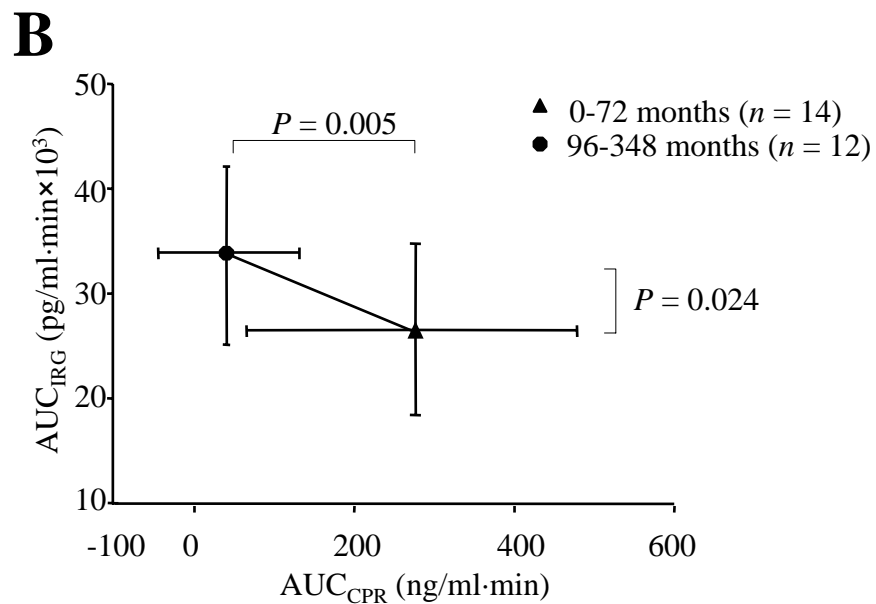

# Supplemental Figure 3

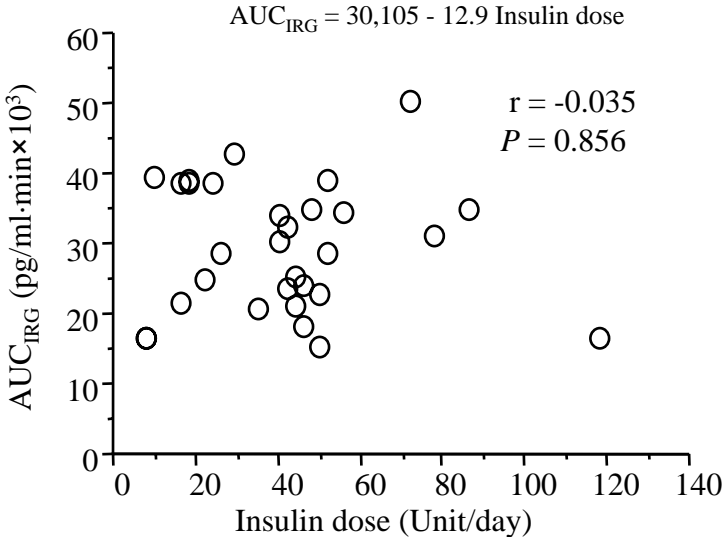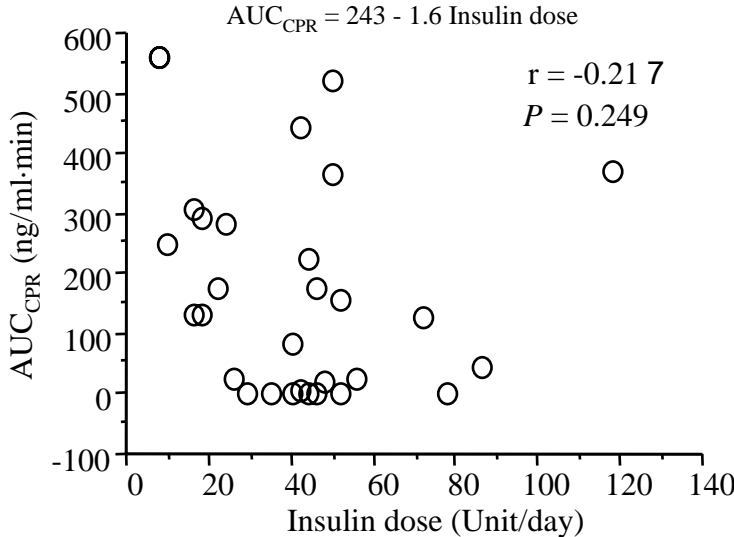

# Supplemental Figure 4

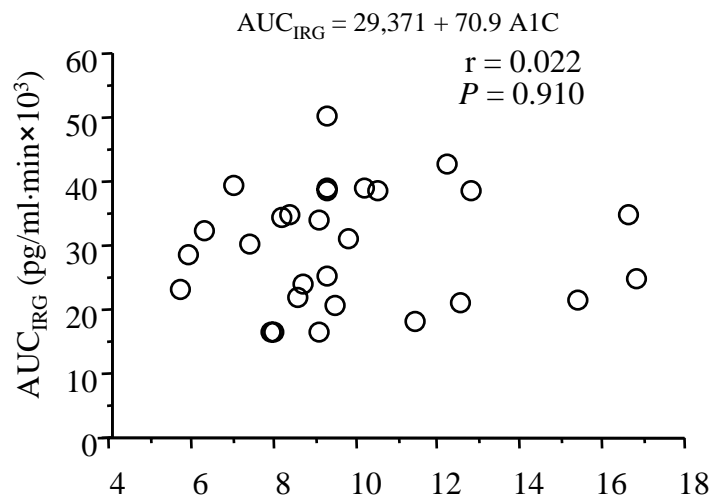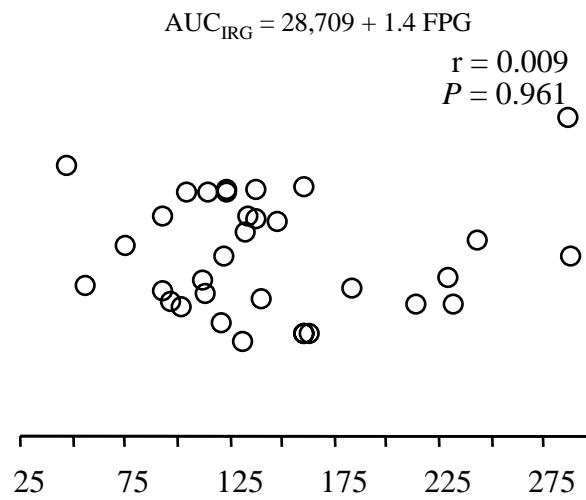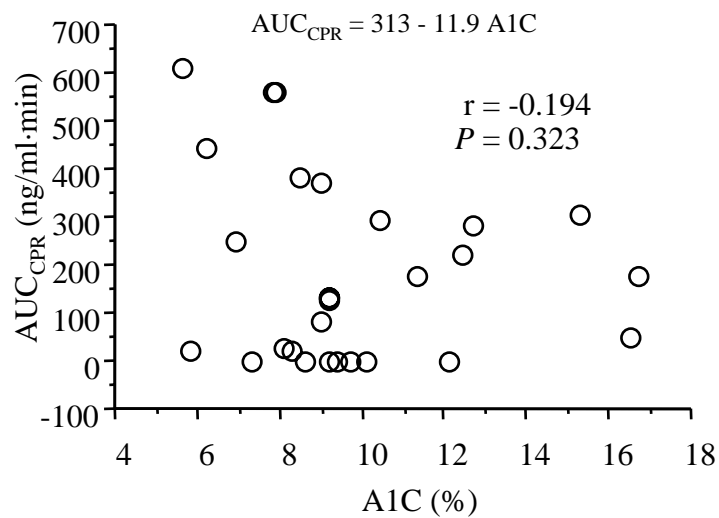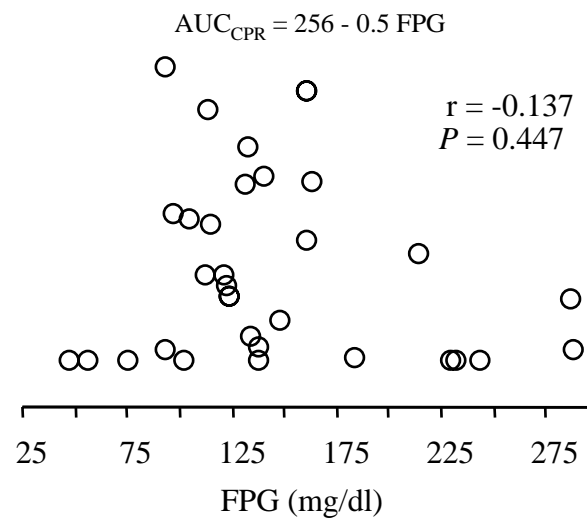

# Supplemental Fig. 5

## A

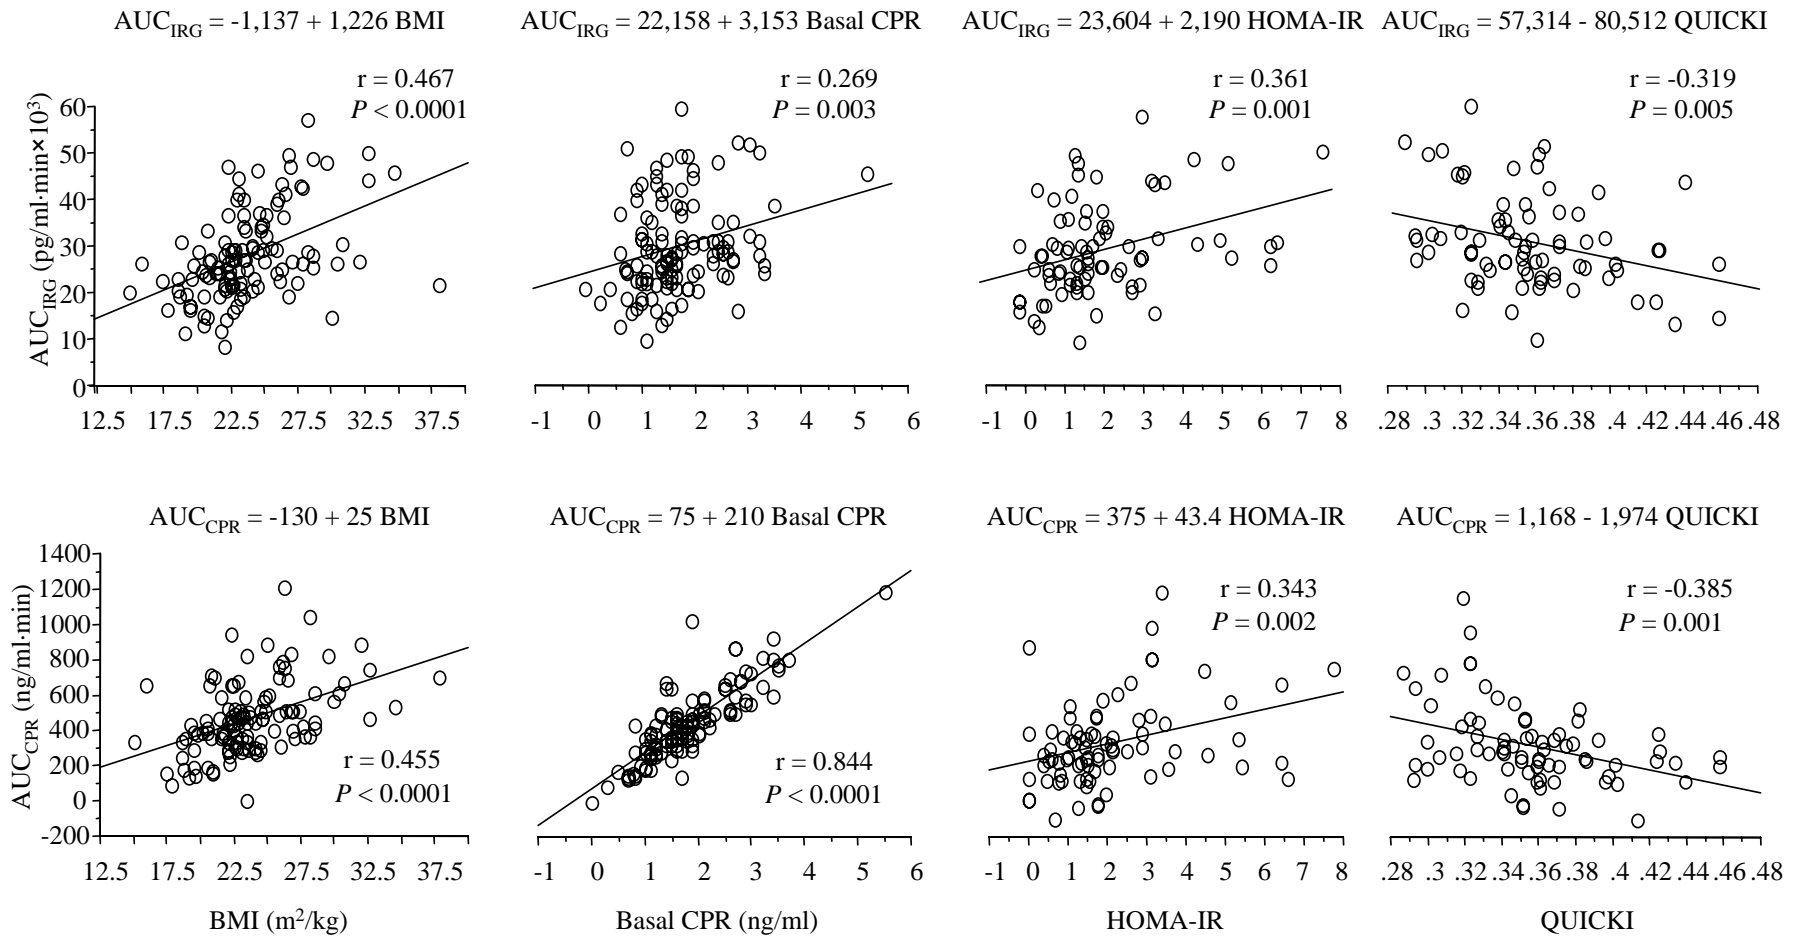

# Supplemental Fig. 5

**B**

BMI

- 15.0-21.6 kg/m<sup>2</sup> (n = 33)
- ▲ 21.7-23.1 kg/m<sup>2</sup> (n = 33)
- 23.2-26.2 kg/m<sup>2</sup> (n = 32)
- ◆ 26.4-37.8 kg/m<sup>2</sup> (n = 32)

Basal CPR level

- 0-1.4 ng/ml (n = 44)
- ▲ 1.5-2.0 ng/ml (n = 43)
- 2.1-5.5 ng/ml (n = 43)

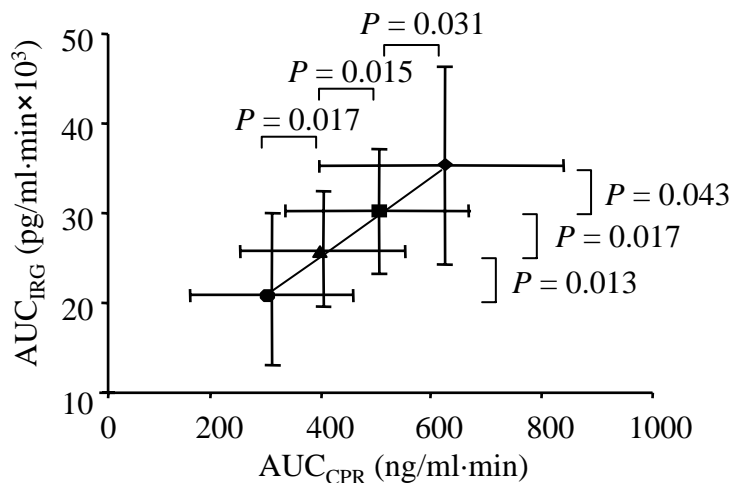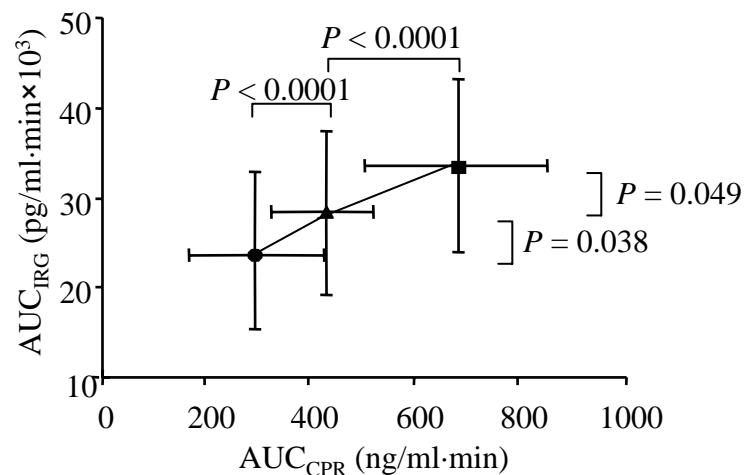

HOMA-IR

- 0-1.7 (n = 42)
- ▲ 1.7-7.7 (n = 42)

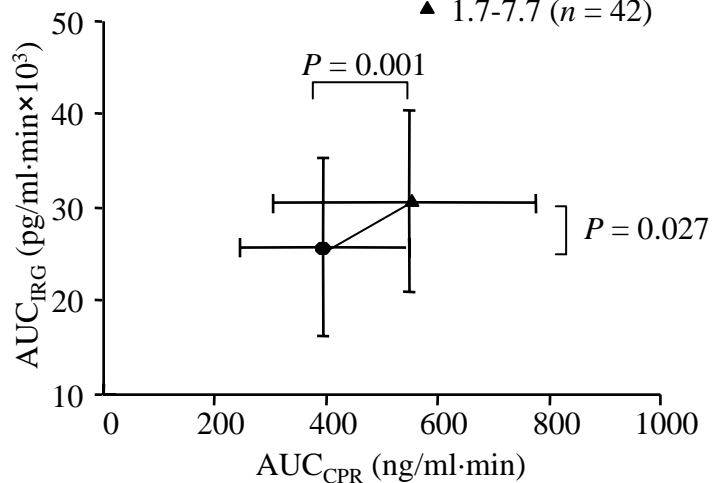

QUICKI

- 0.353-0.458 (n = 40)
- ▲ 0.286-0.353 (n = 39)

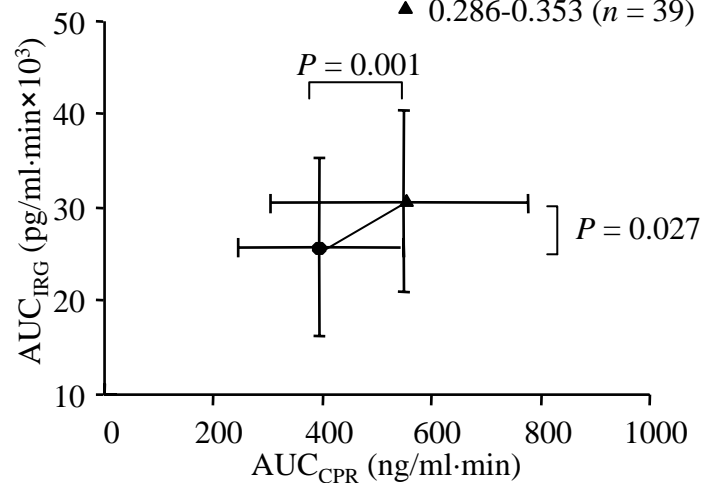

# Supplemental Figure 6

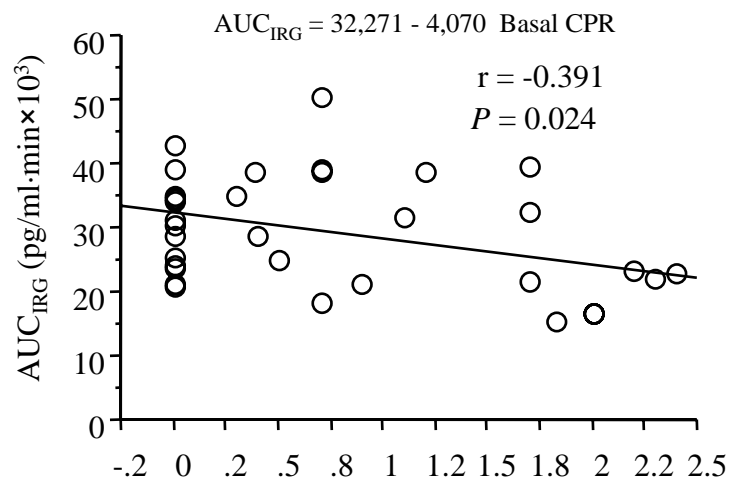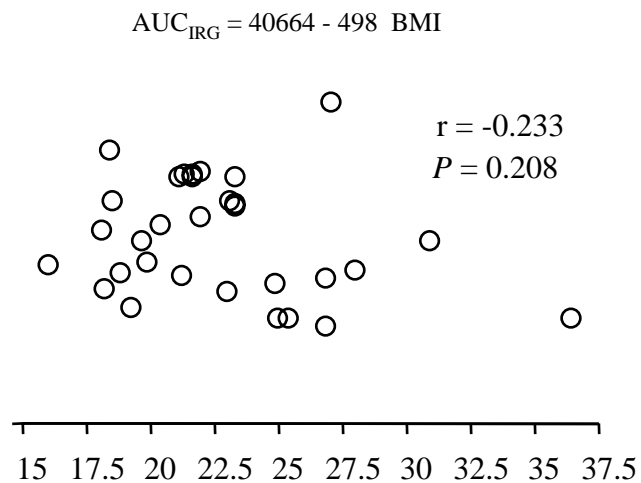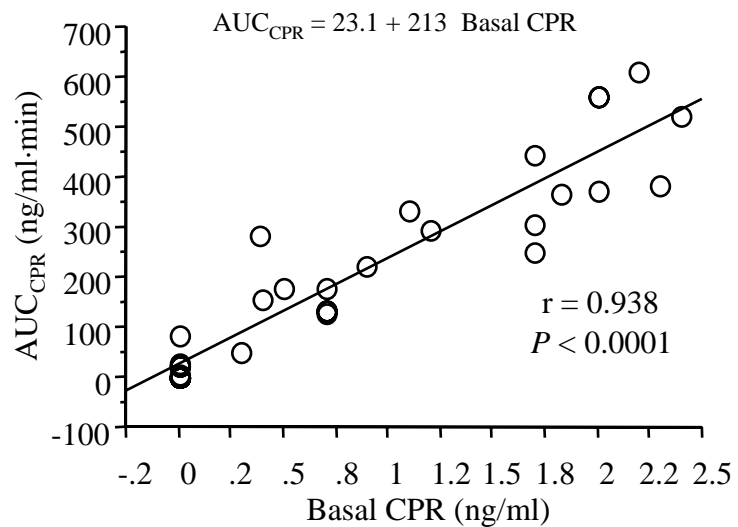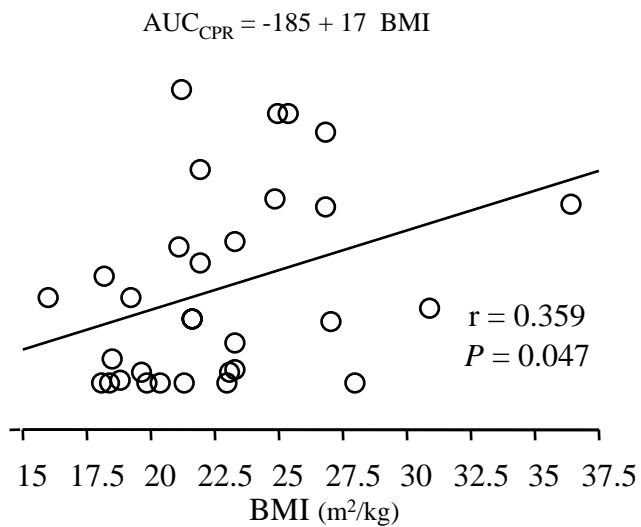

# Supplemental Figure 7

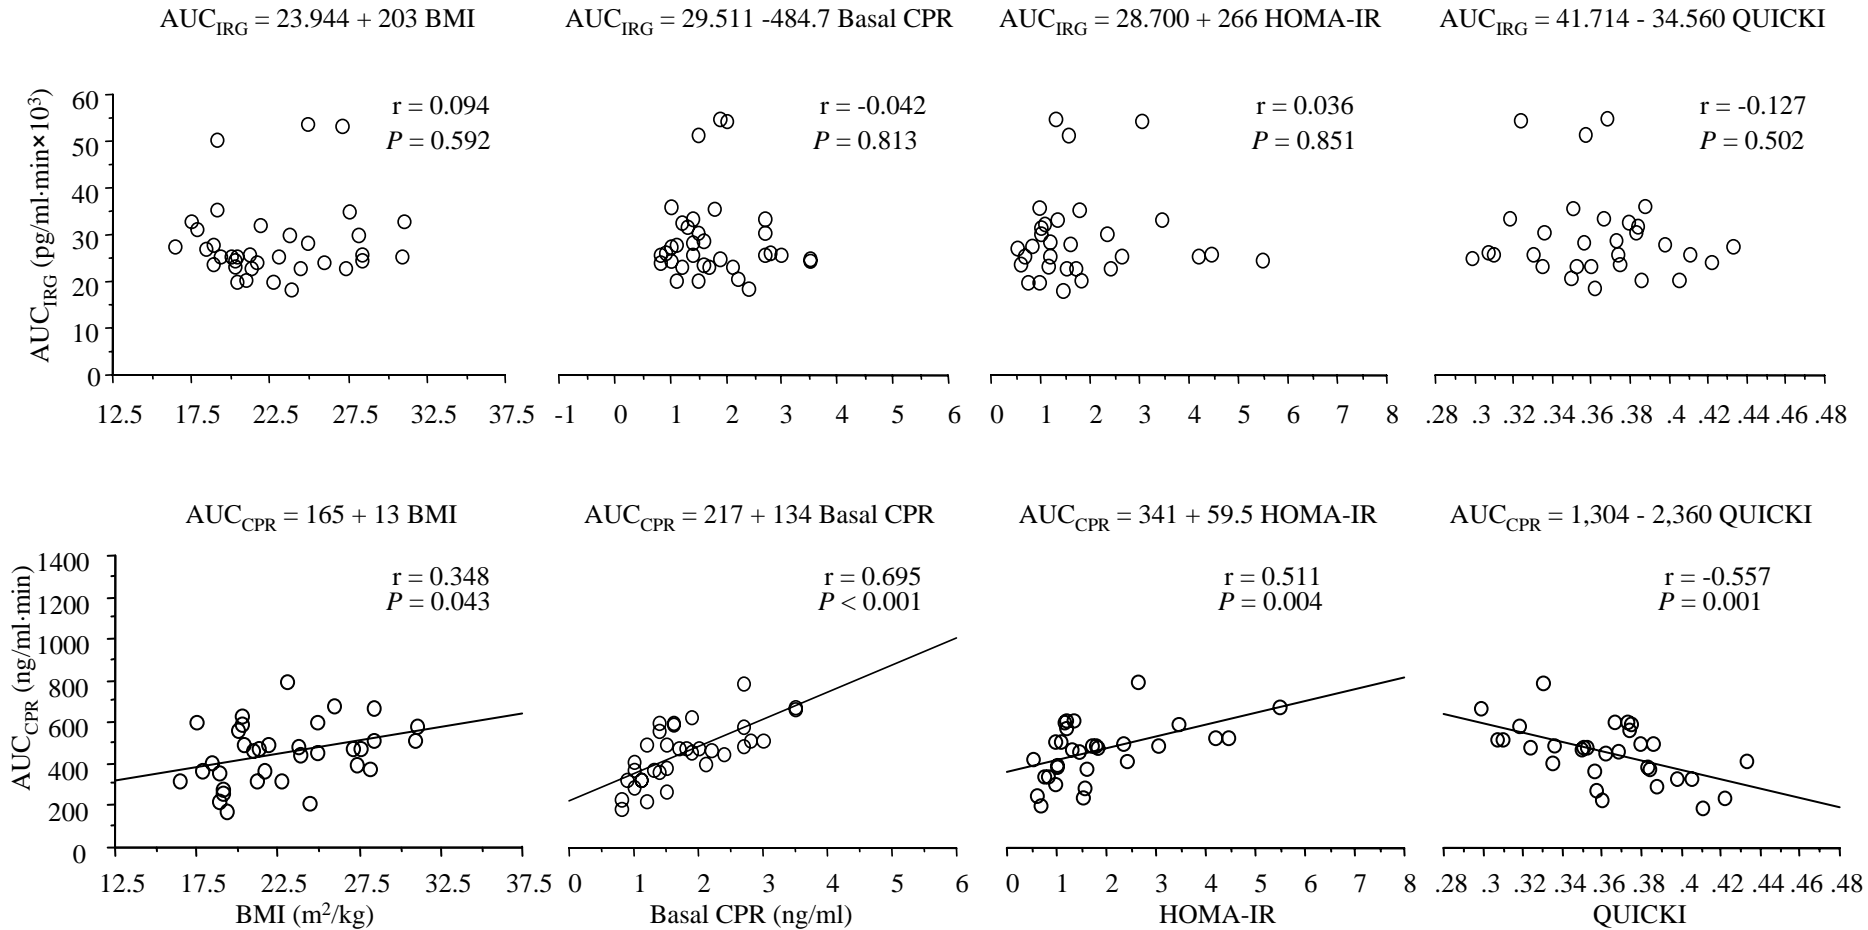

# Supplemental Figure 8

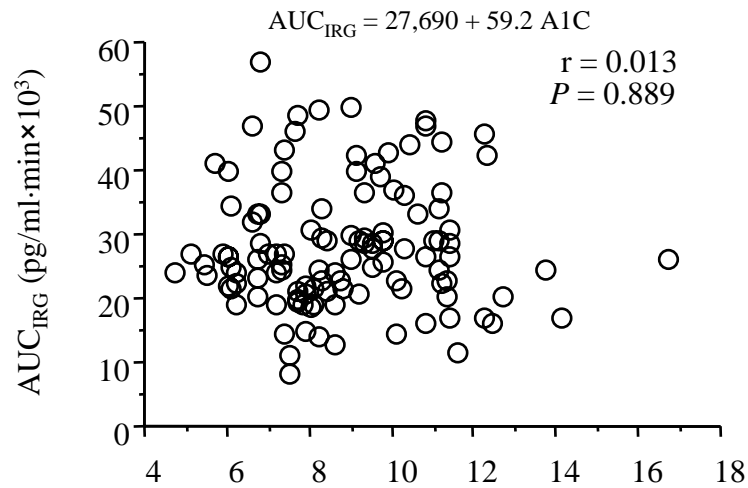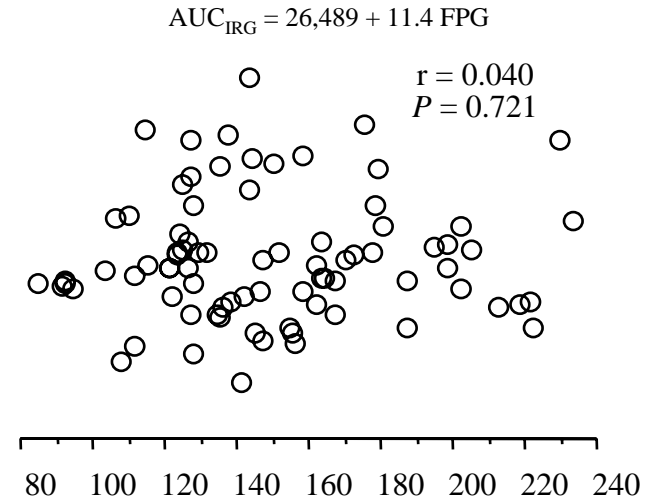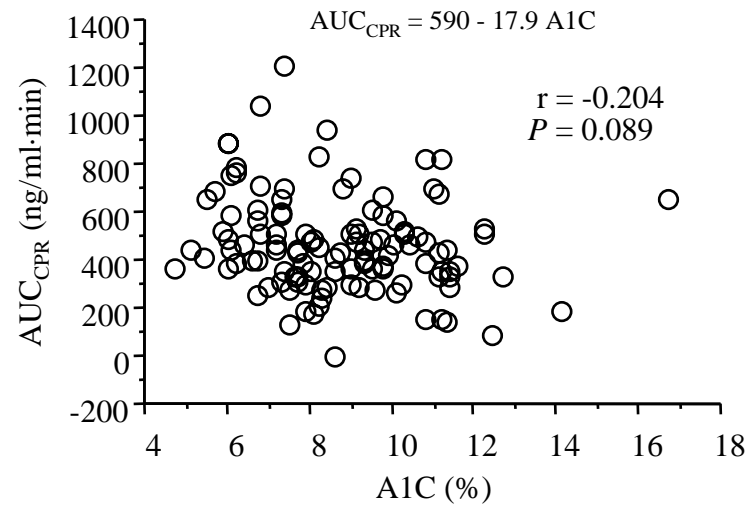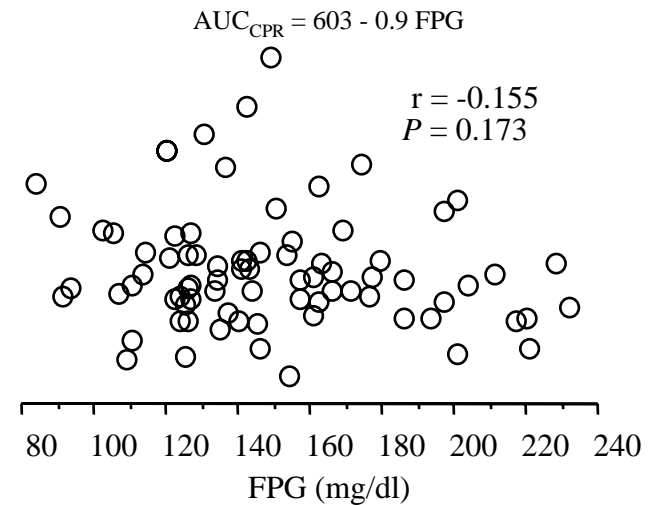

# Supplemental Figure 9

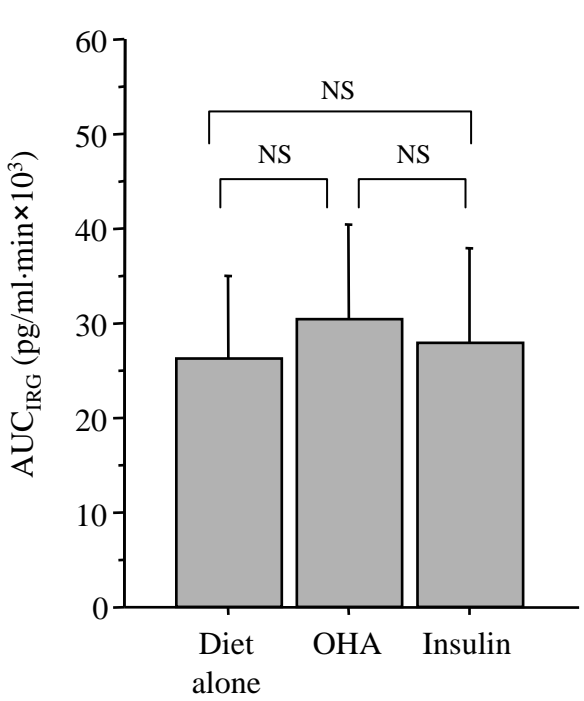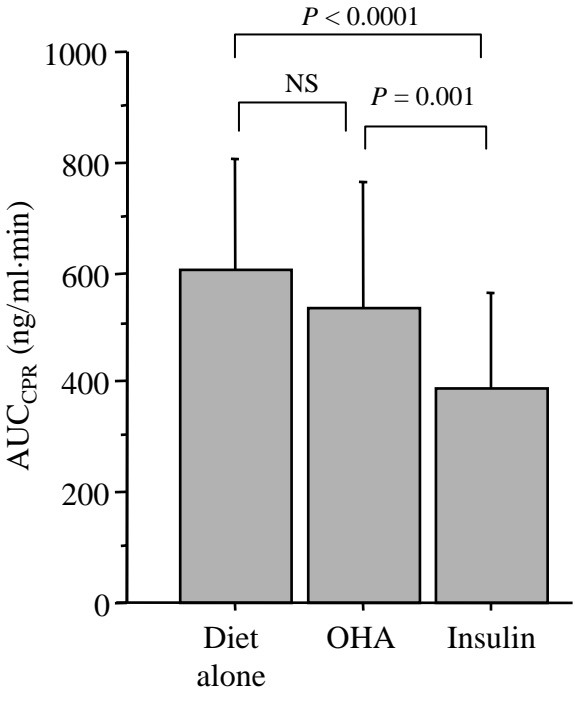

Supplement: dc070066OnlineAppenSupplFigure.pdf [file dc070066OnlineAppenSupplFigure.pdf]
